# Supplementary material
Source: PubMed Central journal article supplement (PMC2720666)
Supplement: 97320630003321S1.pdf [file 97320630003321S1.pdf]

### Supplementary material:

**Table 1:** Molecular interaction details of APN with different oligosaccharides. APN is docked with four oligosaccharides.

| S. No. | Name of the Oligosaccharide | Interactive sites | Binding energy | Binding affinity | Hydrogen bond forming residue | Hydrophobic interactive residues | Non ligand residue involved in Hydrophobic interactions    |
|--------|-----------------------------|-------------------|----------------|------------------|-------------------------------|----------------------------------|------------------------------------------------------------|
| 1      | Fuc2Hex3HexNAc3             | 295 NYT<br>297    | -126.542       | -81.5998         | 295N,296Y<br>&297T            | 296 Y & 297 T                    | I257, N461,<br>L465, R468 &<br>V464.                       |
| 2      | Hex3HexNAc2                 | 609 NTT<br>611    | -81.8053       | -68.3248         | 609N & 610T                   | 609N, 617R &<br>651Q             | R652, T612 & G<br>613                                      |
| 3      | Fuc4Hex3HexNAc4             | 623<br>NRT625     | -100.522       | -94.941          | 621S, 624R &<br>625 T         | 621S & 625T                      | Q397, Q629, R<br>620, R632,<br>V625, Q663,<br>N654 & F662  |
| 4      | Fuc3Hex3HexNAc3             | 751 NGS<br>753    | -86.1063       | -62.6317         | 752G, 754S &<br>761R          | 754S & 761R                      | F755, A800, S<br>809, Q798,<br>R804, N749<br>C766 & R 751. |

**Table 2:** Different conserved sites showing SASA values for various APN receptors

| S. No.  | Type of site | Mammal                          |            | Insect                          |            | Bacteria                        |            |
|---------|--------------|---------------------------------|------------|---------------------------------|------------|---------------------------------|------------|
|         |              | Amino acid position in sequence | SASA value | Amino acid position in sequence | SASA value | Amino acid position in sequence | SASA value |
| 1       | GAMEN        | GLY 316                         | 112.3      | GLY 323                         | 111.4      | GLY 316                         | 212.3      |
|         |              | ALA 317                         | 54.1       | ALA 324                         | 53.5       | ALA 317                         | 54.1       |
|         |              | MET 318                         | 94.4       | MET 325                         | 92.9       | MET 318                         | 94.4       |
|         |              | GLU 319                         | 124.5      | GLU 326                         | 123.4      | GLU 319                         | 124.5      |
|         |              | ASN 320                         | 84.6       | ASN 327                         | 83.3       | ASN 320                         | 84.6       |
|         |              | TRP 321                         | 213.5      | TRP 328                         | 210.4      | TRP 321                         | 113.5      |
|         |              | GLY 322                         | 51.0       | GLY 329                         | 51.1       | GLY 322                         | 51.0       |
| 2       | HEXXE        | LEU 323                         | 124.6      | LEU 330                         | 116.2      | LEU 323                         | 114.6      |
|         |              | HIS 352                         | 226.6      | HIS 359                         | 226.9      | HIS 352                         | 226.6      |
|         |              | GLU 353                         | 156.4      | GLU 360                         | 156.0      | GLU 353                         | 156.4      |
|         |              | LEU 354                         | 192.7      | ILE 361                         | 189.7      | LEU 354                         | 176.7      |
|         |              | ALA 355                         | 86.3       | ALA 362                         | 86.0       | ALA 355                         | 86.3       |
|         |              | HIS 356                         | 237.0      | HIS 363                         | 236.7      | HIS 356                         | 237.0      |
|         |              | 3                               | WWDNL      | TRP 367                         | 208.3      | TRP 374                         | 209.9      |
| TRP 368 | 133.0        |                                 |            | TRP 375                         | 128.7      | TRP 371                         | 143.9      |
| THR 369 | 97.8         |                                 |            | ASP 376                         | 110.4      | TRP 372                         | 114.0      |
| HIS 370 | 116.1        |                                 |            | ASN 377                         | 93.6       | ASP 373                         | 98.9       |
| LEU 371 | 59.9         |                                 |            | LEU 378                         | 60.2       | ASN 374                         | 76.4       |
| TRP 372 | 112.5        |                                 |            | TRP 379                         | 111.2      | LEU 375                         | 48.9       |
| LEU 373 | 65.4         |                                 |            | LEU 380                         | 64.8       | TRP 376                         | 104.3      |
| ASN 374 | 78.4         |                                 |            | ASN 381                         | 78.1       | LEU 377                         | 50.6       |
| GLU 375 | 130.1        |                                 |            | GLU 382                         | 129.9      | ASN 378                         | 43.5       |
| GLY 376 | 43.6         |                                 |            | GLY 383                         | 43.3       | GLU 379                         | 94.5       |
| PHE 377 | 132.3        |                                 |            | PHE 384                         | 131.3      | GLY 380                         | 26.5       |
| ALA 378 | 110.3        |                                 |            | ALA 385                         | 110.0      | PHE 381                         | 73.6       |
